# Supplementary material
Source: PubMed Central journal article supplement (PMC4954557)
Supplement: supp_czv035_heapol-2014-feb-0083.pdf [file supp_czv035_heapol-2014-feb-0083.pdf]

**Appendix I: Figures**

**Figure 1: Structure of the WHO TB Department adapted from WHO Organigram (2012)**

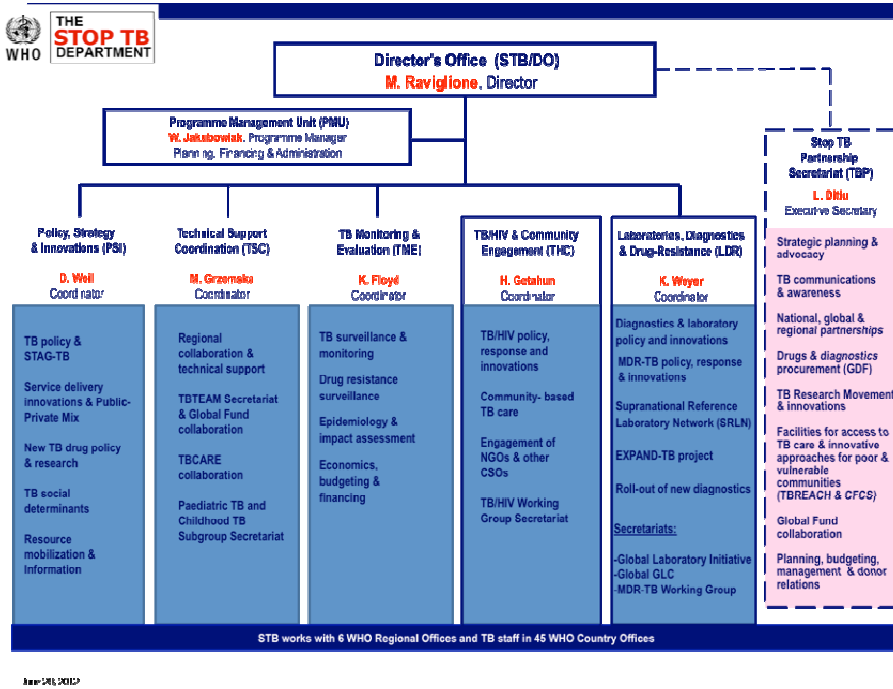

**Figure 2: Revised Structure of the Stop TB Partnership from the Global Plan 2011-2015 (2010)**

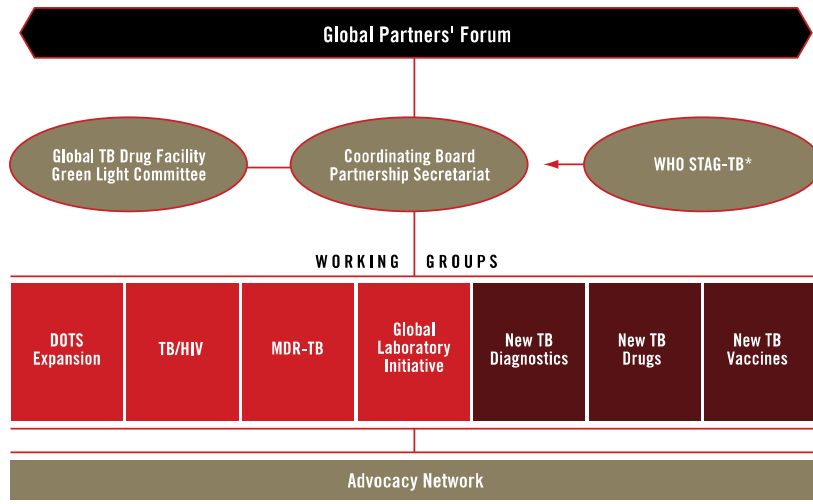

\* STAG-TB: Scientific and Technical Advisory Group for Tuberculosis

**Figure 3: Total Global Funding for TB from 2002-2013**

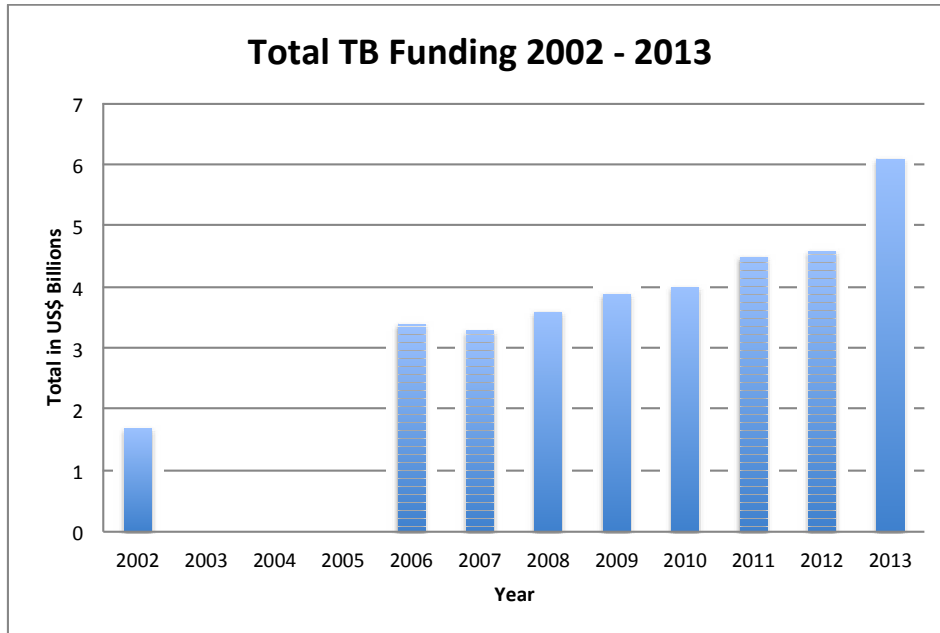

(Total TB Funding data are from the annual WHO Global TB Control Reports, data missing for 2003-2005)

**Figure 4: Number of Countries Adopting the DOTS Policy from 1995-2007**

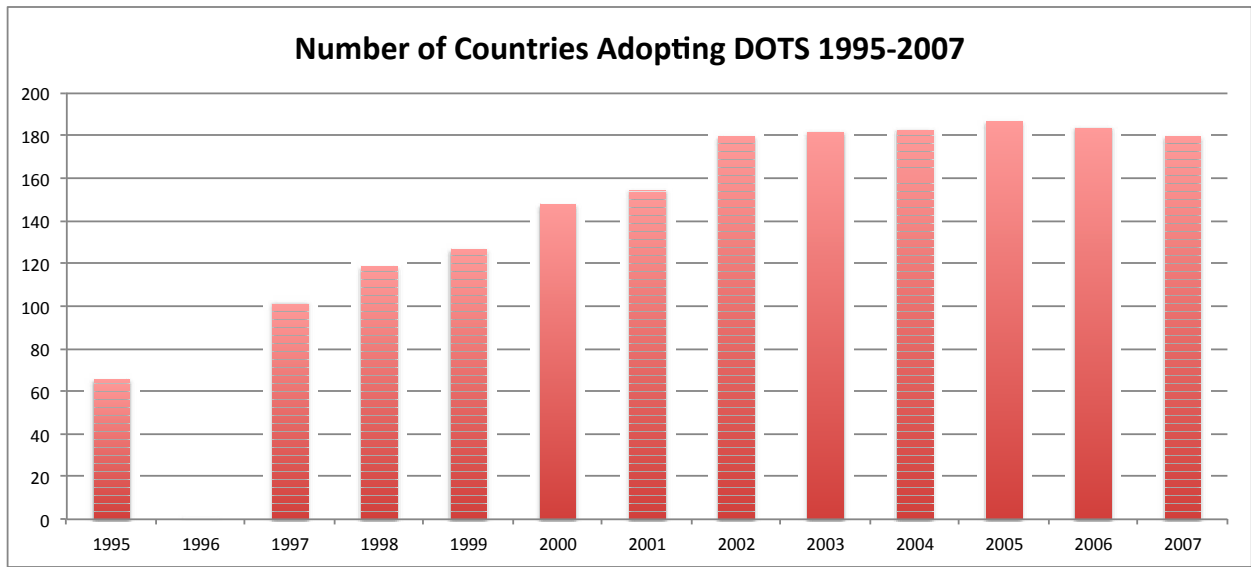

(Policy adoption data come from the annual WHO Global TB Control Reports, data missing for 1996)

**Figure 5: Drug Susceptible and Drug Resistant TB Case Detection and Treatment Success 1995-2013**

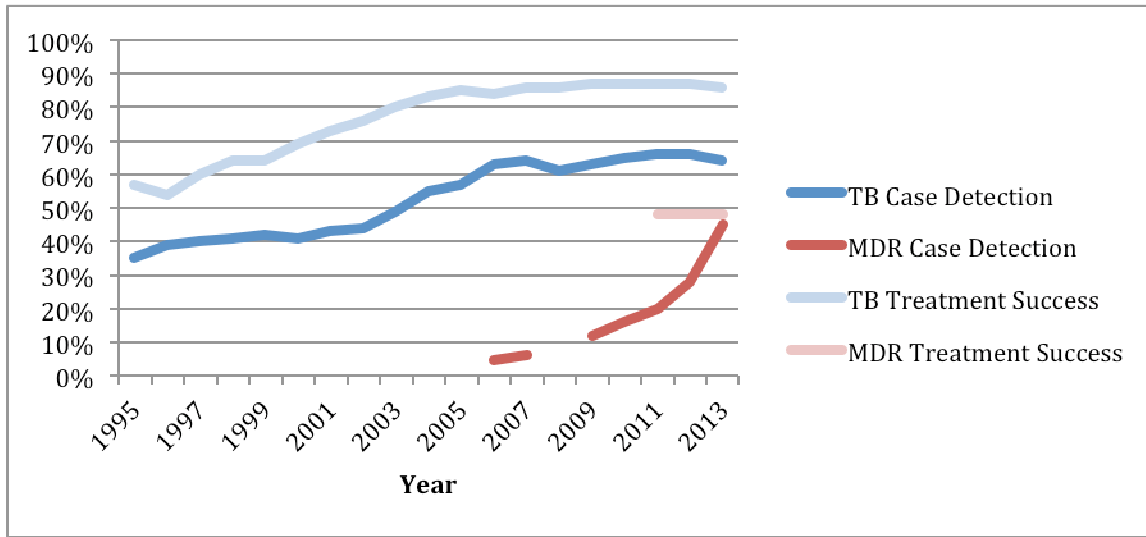

(Case detection and treatment success data come from the annual WHO Global TB Control Reports)

## **Appendix II: Coordinating Board Membership**

- Three representatives of financial donors,
- One representative of Foundations,
- Technical Agencies (two seats shared amongst CDC, the Union, and KNCV),
- Four representatives of multilaterals, one each from WHO, The World Bank and The Global Fund to Fight AIDS, Tuberculosis and Malaria and one UN agency,
- One representative of developing country NGO,
- One representative of developed country NGO,
- One representative of the private sector,
- Two representatives from TB Affected Communities,
- Two representatives of Working Groups (one from Research Working Groups and one from Implementation Working Groups),
- Six representatives from TB Affected Countries
- Two open seats

Additionally there are the following non-voting seats on the Board:

- Board Chair
- Vice-Chair
- UNITAID

**Appendix III: Timeline of policy development, events, and network changes**

| Date/environment                             | Policy developments/events                                                                                                                                                        | Network shifts and key actors                                                          |
|----------------------------------------------|-----------------------------------------------------------------------------------------------------------------------------------------------------------------------------------|----------------------------------------------------------------------------------------|
| 1970s: period of complacency                 | <p>TB neglected in West</p> <p>TB Control Programs in low/middle income countries</p>                                                                                             | <p>The Union active in service delivery and some research</p> <p>Small dept in WHO</p> |
| <p>1980s: TB gains attention</p> <p>1989</p> | <p>Link with HIV made</p> <p>The Union's Styblo demonstrates success in TB control through short course therapy</p>                                                               | <p>WHO's TB Unit enlarged</p>                                                          |
| 1990                                         | <p>WHO recommends standardized short-course chemo therapy for developing countries</p>                                                                                            | <p>More staff appointed at WHO</p>                                                     |
| 1991                                         | <p>MDR-TB in New York hit headlines</p> <p>WHO and WB initiate China TB project testing implementation of short course therapy.</p> <p>World Health Assembly Resolution on TB</p> | <p>World Bank supports TB study in China</p> <p>WHO</p>                                |
| 1993                                         | <p>Mass media event in London in 1993 declaring <b><i>TB a Global Emergency.</i></b></p> <p>World Bank Development Report says TB control a cost-effective measure</p>            | <p>Advocacy expert hired by WHO TB Unit</p>                                            |
| 1995                                         | <p>DOTS marketed as strategy for addressing TB</p>                                                                                                                                | <p>WHO</p>                                                                             |
| 1997                                         | <p>Establishment of Global Surveillance and Monitoring System at WHO</p> <p>First global monitoring report on TB published</p>                                                    | <p>WHO</p>                                                                             |
| 1998                                         | <p>Meeting of the Ad Hoc Committee in London</p> <p>Launch in Bangkok of the Stop TB Initiative</p>                                                                               | <p>WHO initiative, with the Union, several donors, and high burden countries</p>       |
| 2000                                         | <p>Amsterdam Declaration to Stop TB. It called for action from ministerial</p>                                                                                                    | <p>Research institutions, donors, and NGOs</p>                                         |

|           |                                                                                                                                                                                                                                   |                                                                        |
|-----------|-----------------------------------------------------------------------------------------------------------------------------------------------------------------------------------------------------------------------------------|------------------------------------------------------------------------|
|           | <p>delegations</p> <p>Millennium Development Goals established by UN, with TB as part of goal 6</p>                                                                                                                               | <p>become more involved in TB discourses</p>                           |
| 2001      | <p>The First Partners' Forum of the Global Stop TB Partnership launched in Washington, DC</p> <p>The Global Plan to Stop TB 2001 – 2005 published as the overarching framework of the Stop TB Partnership's combined actions.</p> | <p>200 partner organizations – any group can join existing network</p> |
| 2002      | <p>Launch of Global Fund to Fight AIDS, Tuberculosis and Malaria.</p> <p>WHO publishes an expanded DOTS framework addressing the issues of TB/HIV and drug resistance</p>                                                         | <p>Global Fund brings significant resources to TB</p> <p>WHO</p>       |
| 2003-2004 | <p>New Director of the TB Department, Dr. Mario Raviglione, and new Executive Secretary of the Partnership, Marcos Espinal</p>                                                                                                    | <p>WHO</p>                                                             |
| 2006      | <p>New Global Plan 2006-2015</p> <p>New Stop TB Strategy enhancing DOTS</p>                                                                                                                                                       | <p>Many different groups consulted over Plan</p>                       |
| 2009      | <p>Beijing Ministerial Conference on MDR and XDR-TB</p>                                                                                                                                                                           | <p>WHO, Gates Foundations, MOHs from high-burden countries</p>         |
| 2010      | <p>WHO endorses a new and novel rapid test for tuberculosis (TB) called the Gene Expert Diagnostic test.</p>                                                                                                                      | <p>Over 1600 partner organizations</p>                                 |
| 2010-2011 | <p>Selection of new Executive Secretary of Stop TB Partnership</p>                                                                                                                                                                | <p>WHO and the Partnership Coordinating Board Selection Committee</p>  |
| 2013      | <p>Coordinating Board meeting that includes a discussion of alternative hosting arrangements</p>                                                                                                                                  | <p>Partnership Coordinating Board</p>                                  |
